# Supplementary material
Source: Springer Nature journal article supplement (https://www.springermedizin.de/resource/supplementary/12873_2012_155_MOESM2_ESM.pdf/9431514)
Supplement: MOESM2 [file 9431514]

Patients with MHI

N= 565

- Not Swedish residents n=8
- Children n= 15
- S100B sampling more than 3 hours post injury n= 7
- Additional risk factors n= 23

Study population

N=512
